# Supplementary material for: TMEM106B amyloid filaments in the Biondi bodies of ependymal cells
Source: PubMed Central journal article supplement — Acta Neuropathol. 2024 Nov 6;148(1):60. doi: 10.1007/s00401-024-02807-w (PMC11541264; doi:10.1007/s00401-024-02807-w), 2024-11-06
Supplement: 401_2024_2807_MOESM1_ESM.pdf [file 401_2024_2807_MOESM1_ESM.pdf]

**Supplementary Table 1. Cryo-EM data collection, refinement and validation statistics**

|                                                  | Case 3<br>Ependyma and<br>Subependymal<br>Tissue | Case 3<br>Ependyma and<br>Subependymal<br>Tissue | Case 14<br>Choroid<br>plexus | Case 20<br>Choroid<br>plexus |
|--------------------------------------------------|--------------------------------------------------|--------------------------------------------------|------------------------------|------------------------------|
| <b>Data collection</b>                           |                                                  |                                                  |                              |                              |
| Magnification                                    | 96,000                                           | 96,000                                           | 96,000                       | 96,000                       |
| Voltage (kV)                                     | 300                                              | 300                                              | 300                          | 300                          |
| Detector                                         | Falcon-4                                         | Falcon-4                                         | Falcon-4                     | Falcon-4                     |
| Electron dose (e-/Å <sup>2</sup> )               | 30.0                                             | 30.0                                             | 30.0                         | 30.0                         |
| Defocus range (µm)                               | 1.7-2.4                                          | 1.7-2.4                                          | 1.7-2.4                      | 1.7-2.4                      |
| Pixel size (Å)                                   | 0.824                                            | 0.824                                            | 0.824                        | 0.824                        |
| Initial particle images (no.)                    | 39,057                                           | 61,188                                           | 23,157                       | 685,561                      |
|                                                  | TMEM106B                                         | PHF                                              | TMEM106B                     | TMEM106B                     |
| <b>Processing</b>                                |                                                  |                                                  |                              |                              |
| Symmetry imposed                                 | C1                                               | 2 <sub>1</sub>                                   | C1                           | C1                           |
| Final particle images (no.)                      | 5,990                                            | 30,897                                           | 10,971                       | 38,763                       |
| Map resolution (Å)                               | 3.36                                             | 3.04                                             | 3.58                         | 2.64                         |
| FSC threshold = 0.143                            |                                                  |                                                  |                              |                              |
| Helical rise (Å)                                 | 4.80                                             | 2.39                                             | 4.81                         | 4.88                         |
| Helical twist (°)                                | -0.46                                            | 179.43                                           | -0.49                        | -0.46                        |
|                                                  |                                                  |                                                  |                              | Case 20                      |
| <b>Model Refinement</b>                          |                                                  |                                                  |                              |                              |
| Initial model used (PDB)                         |                                                  |                                                  |                              | 7QVC                         |
| Model resolution (Å)                             |                                                  |                                                  |                              | 2.53                         |
| FSC threshold = 0.5                              |                                                  |                                                  |                              |                              |
| Map sharpening <i>B</i> factor (Å <sup>2</sup> ) |                                                  |                                                  |                              | -36.7                        |
| Model composition                                |                                                  |                                                  |                              |                              |
| Non-hydrogen atoms                               |                                                  |                                                  |                              | 4,568                        |
| Protein residues                                 |                                                  |                                                  |                              | 540                          |
| Ligands                                          |                                                  |                                                  |                              | 16                           |
| <i>B</i> factors (Å <sup>2</sup> )               |                                                  |                                                  |                              |                              |
| Protein                                          |                                                  |                                                  |                              | 44.8                         |
| R.m.s. deviations                                |                                                  |                                                  |                              |                              |
| Bond lengths (Å)                                 |                                                  |                                                  |                              | 0.0066                       |
| Bond angles (°)                                  |                                                  |                                                  |                              | 1.320                        |
| Validation                                       |                                                  |                                                  |                              |                              |
| MolProbity score                                 |                                                  |                                                  |                              | 1.58                         |
| Clashscore                                       |                                                  |                                                  |                              | 3.52                         |
| Poor rotamers (%)                                |                                                  |                                                  |                              | 0.00                         |
| Ramachandran plot                                |                                                  |                                                  |                              |                              |
| Favored (%)                                      |                                                  |                                                  |                              | 93.23                        |
| Allowed (%)                                      |                                                  |                                                  |                              | 6.77                         |
| Disallowed (%)                                   |                                                  |                                                  |                              | 0.00                         |
| PDB                                              |                                                  |                                                  |                              | 9FNB                         |
| EMDB                                             |                                                  |                                                  |                              | EMD-50587                    |

PHF = paired helical filaments; FSC = Fourier shell correlation; PDB = protein data bank; EMDB = electron microscopy data bank;

**a**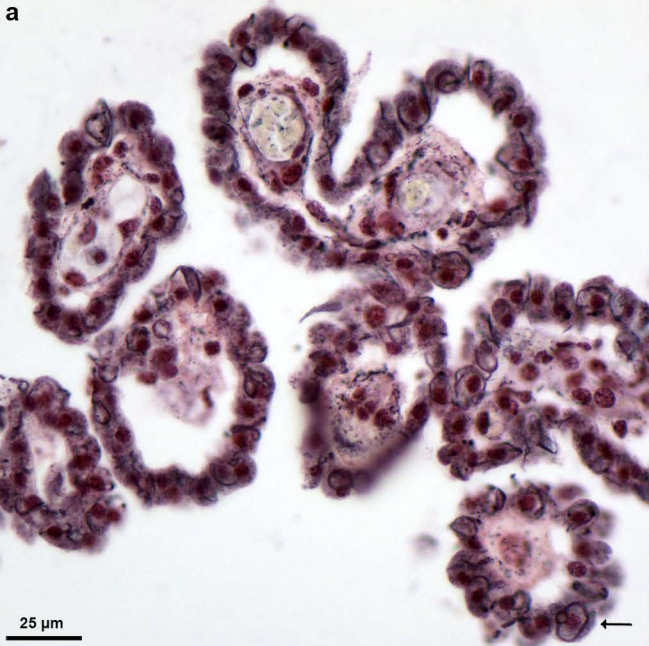**b**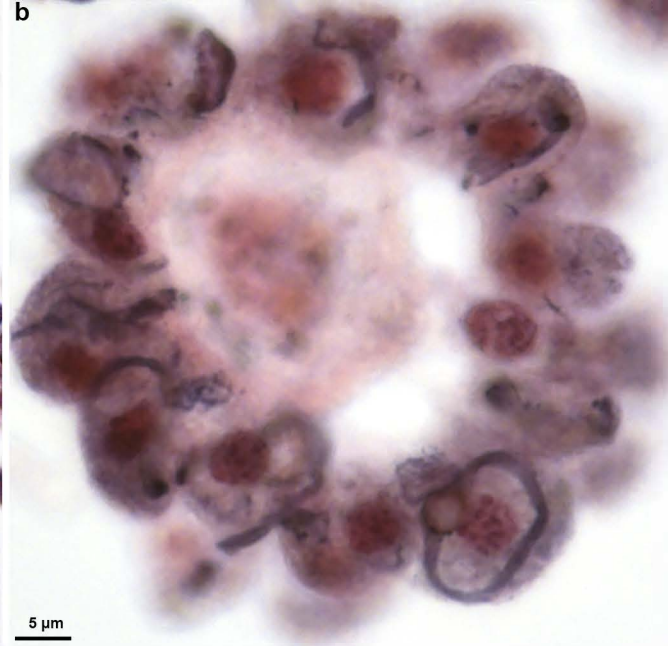

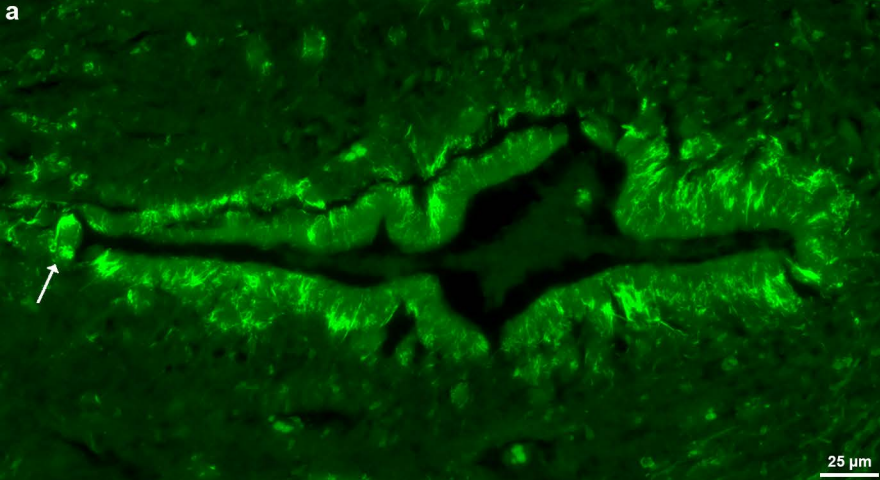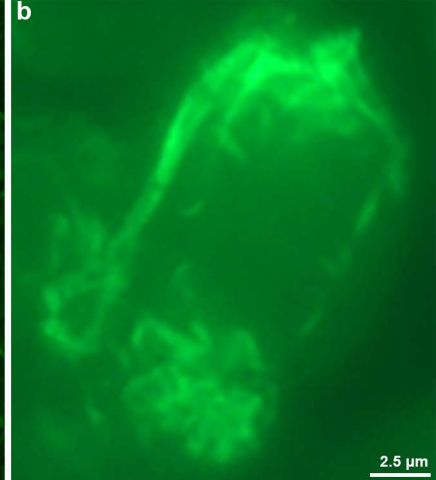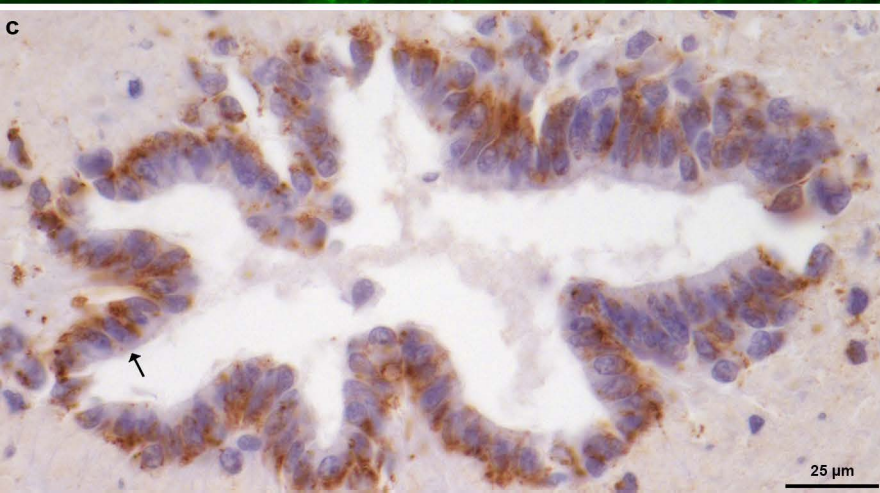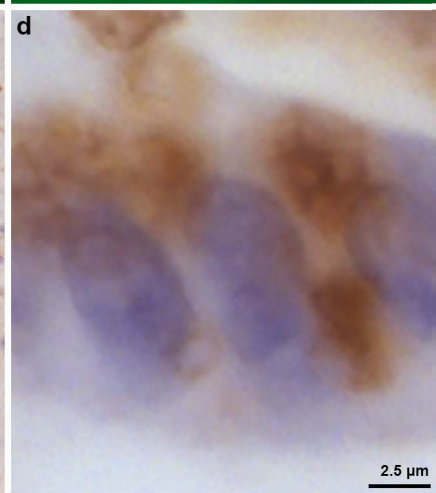

**A303-439A**

**pFTAA**

**Hoechst Merged**

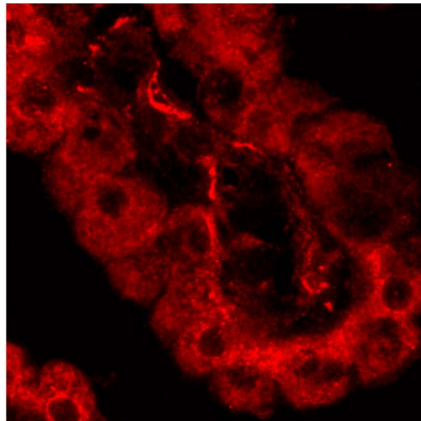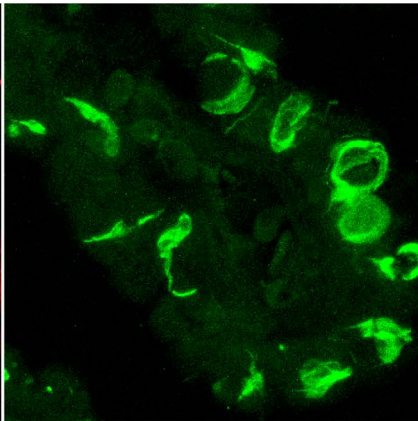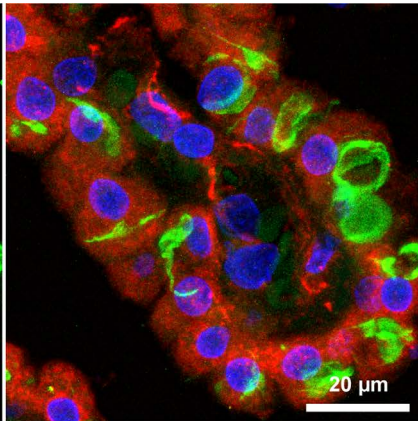

**TMEM263**

**pFTAA**

**Hoechst Merged**

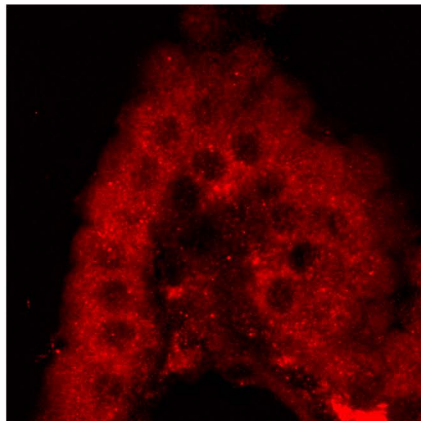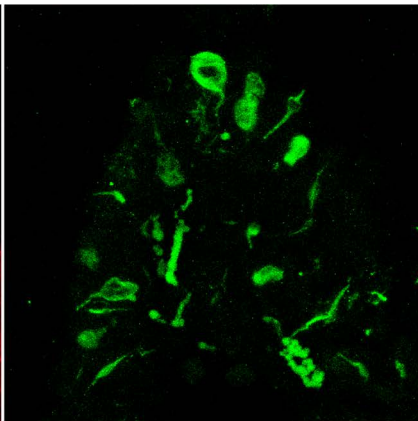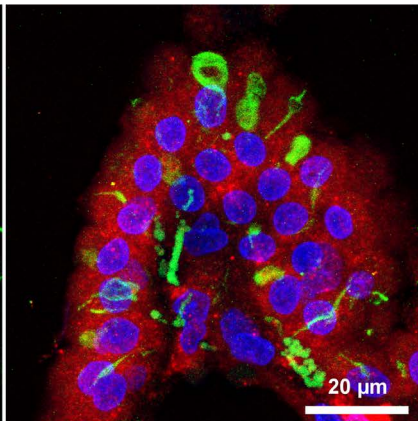



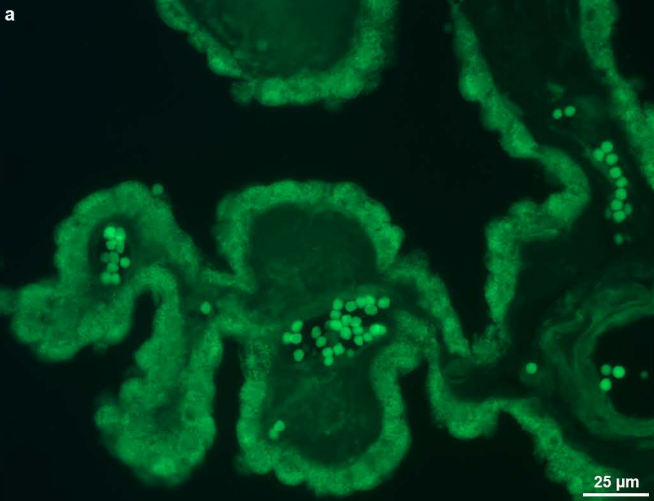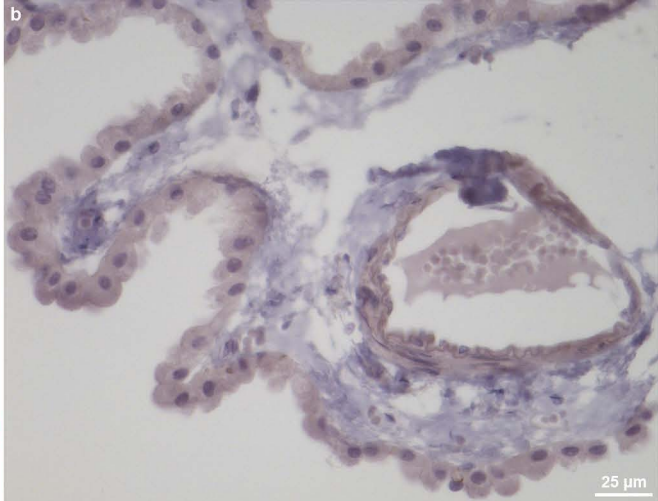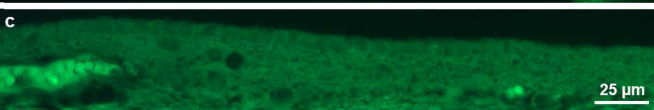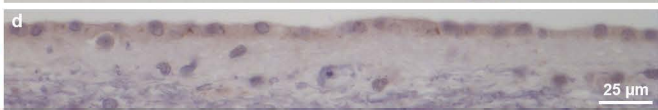

**No Primary Ab  
Alexa Fluor 647**

**pFTAA**

**Hoechst Merged**

**a**

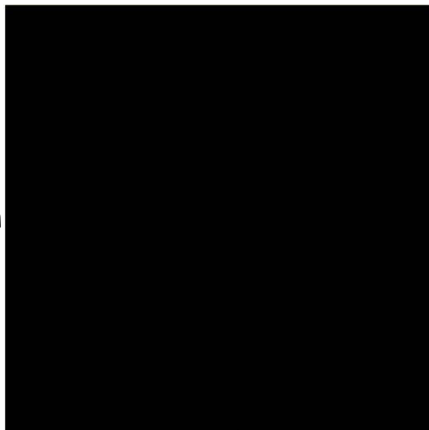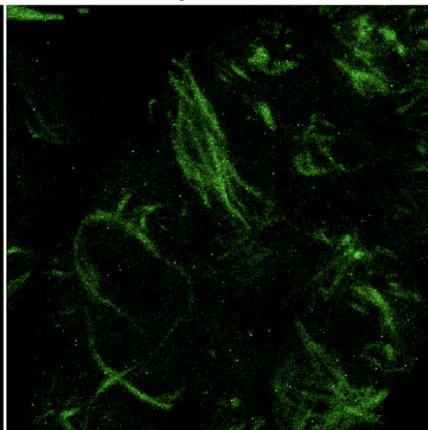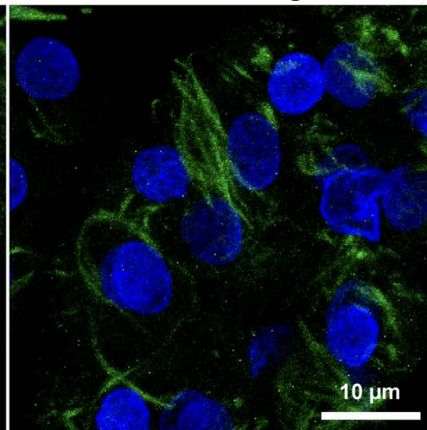

10 μm

**No Primary Ab  
Alexa Fluor 568**

**No Primary Ab  
Alexa Fluor 488**

**Hoechst Merged**

**b**

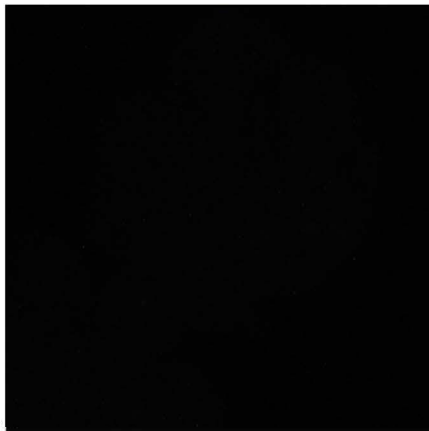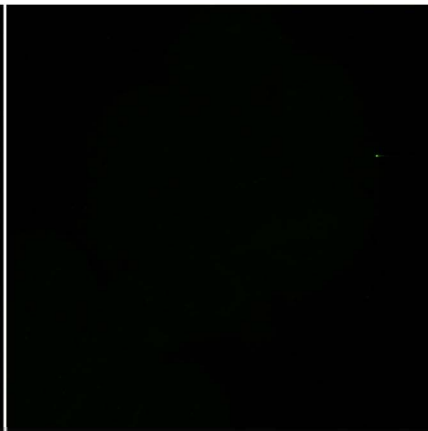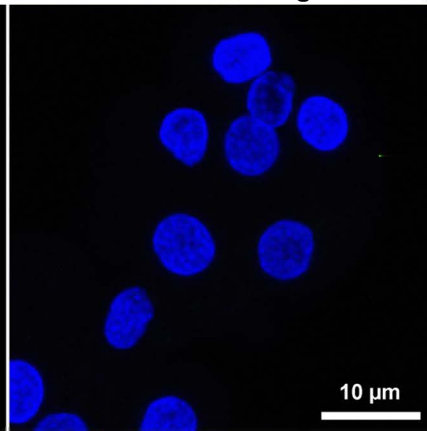

10 μm

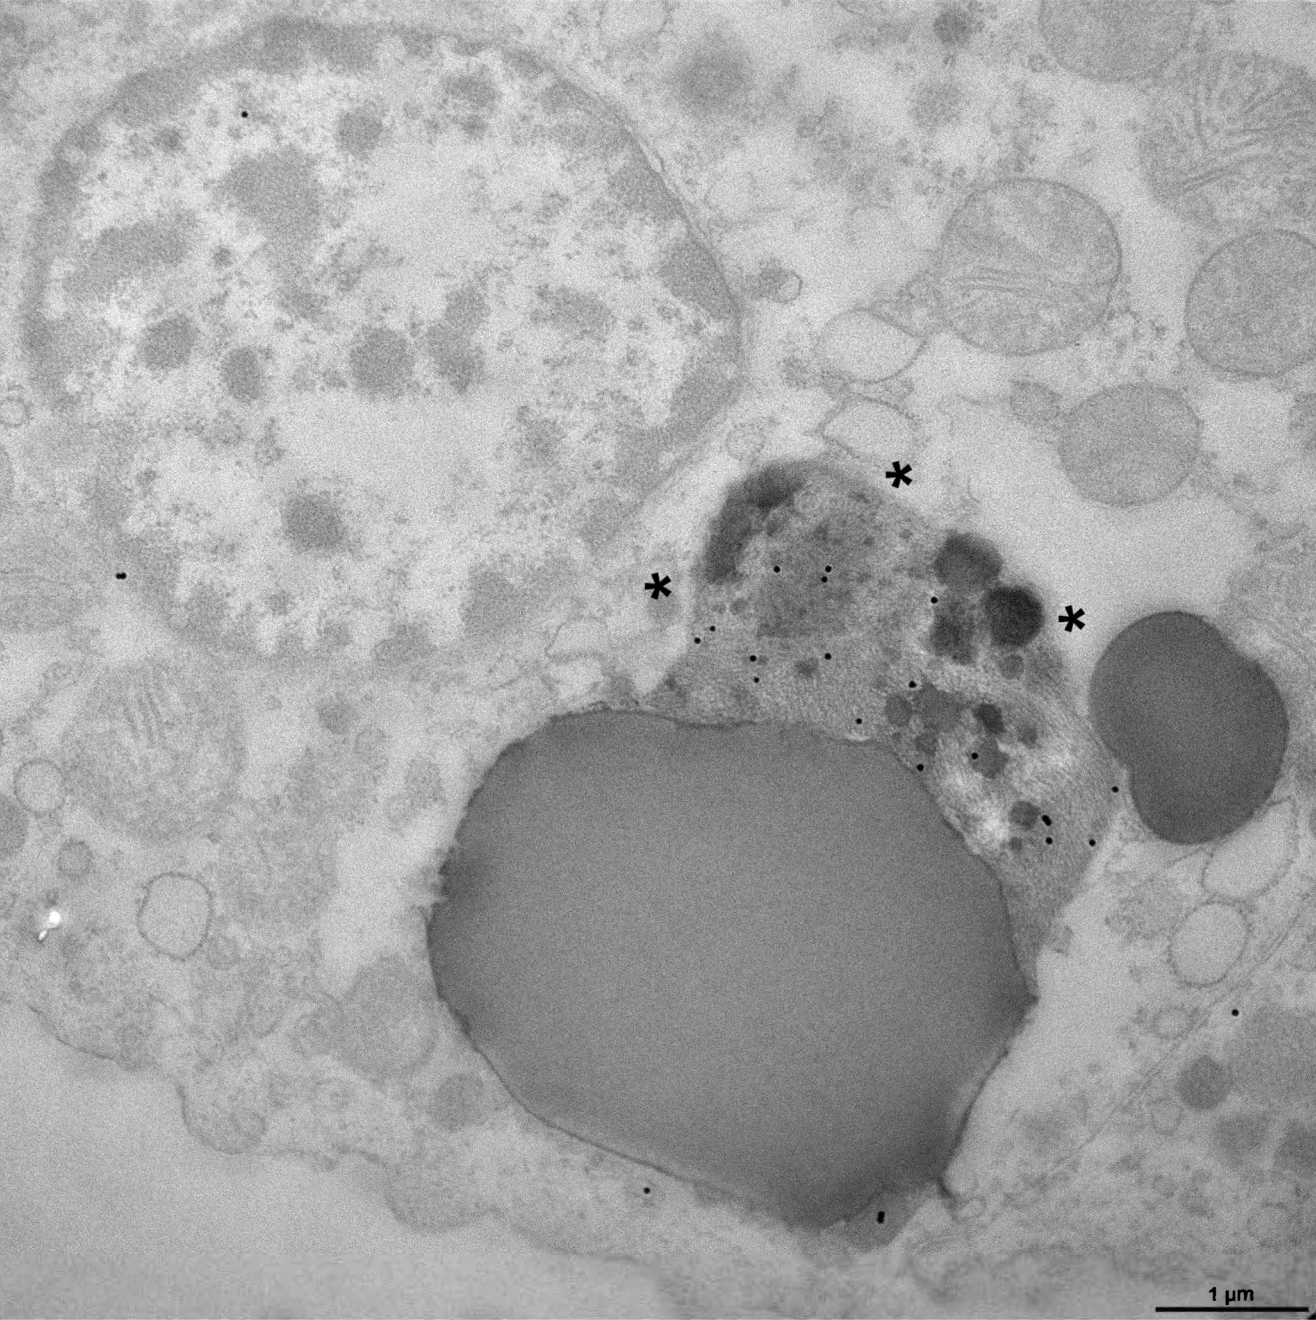

1  $\mu$ m

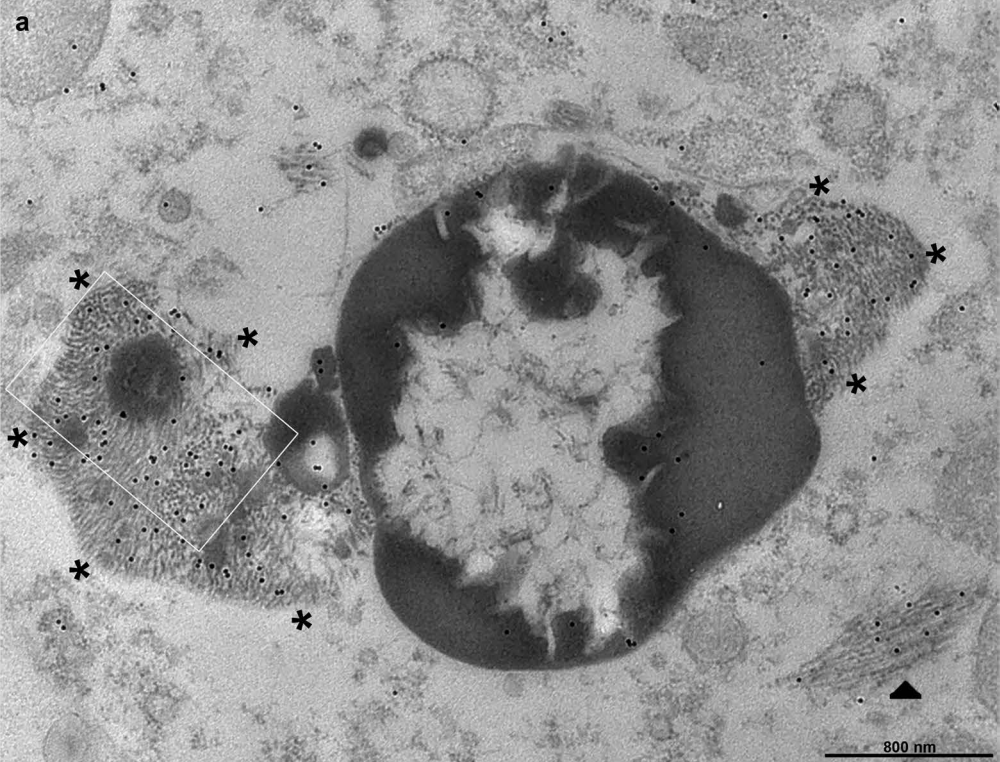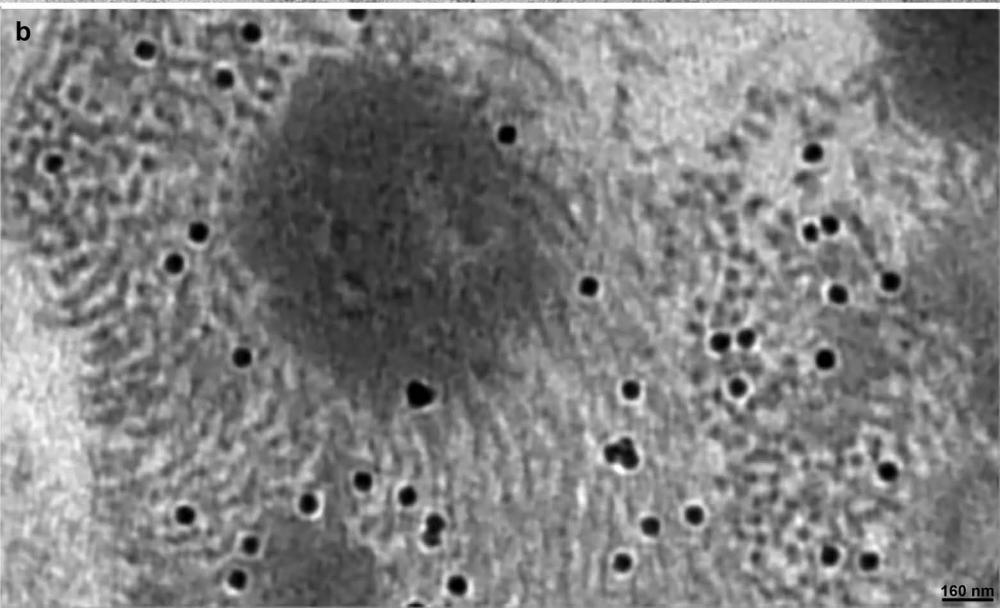



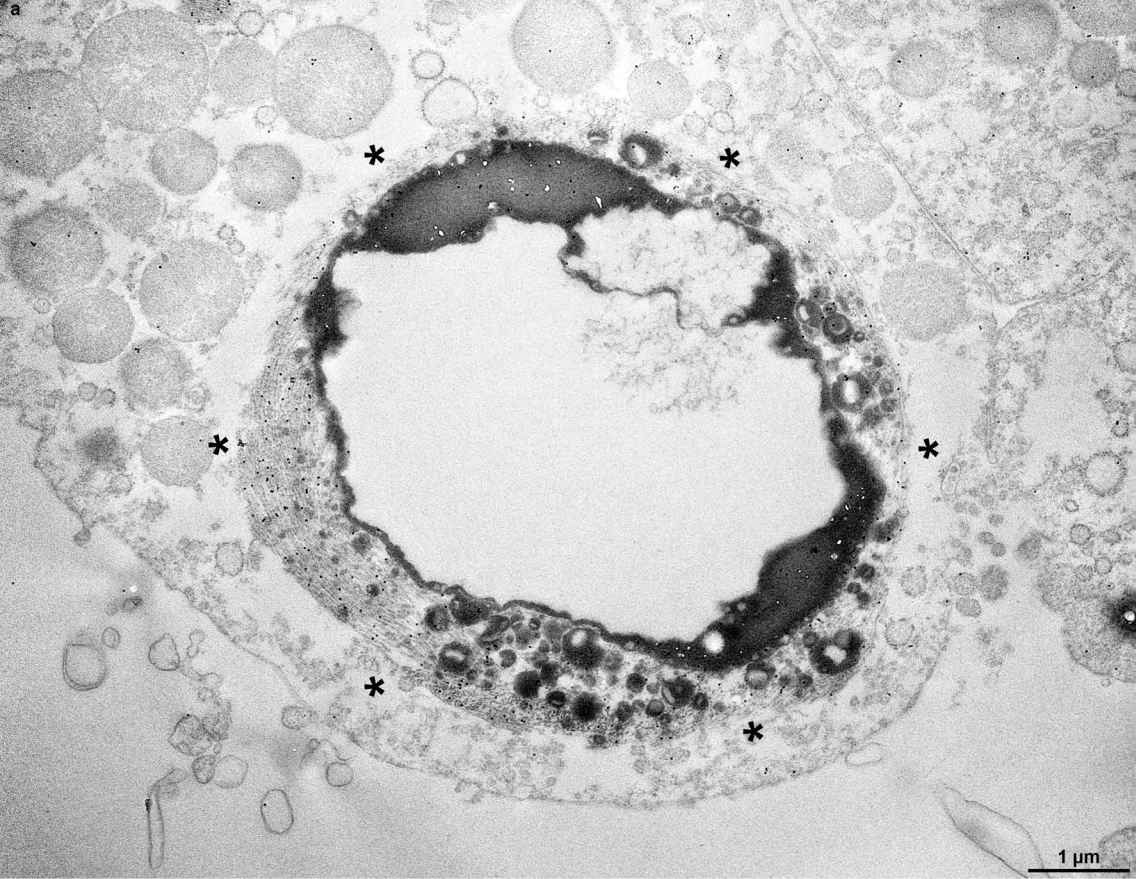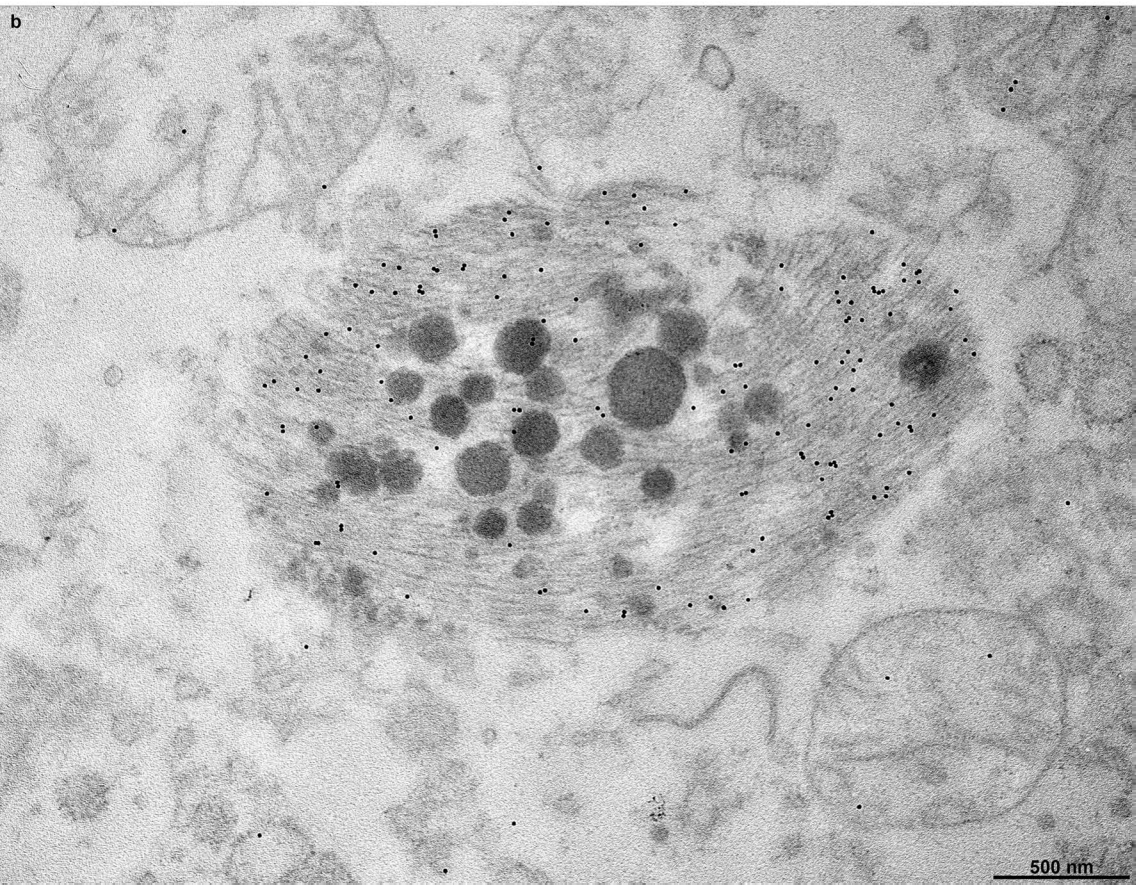

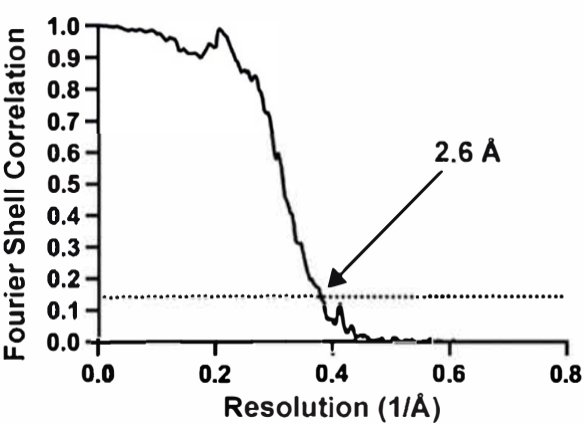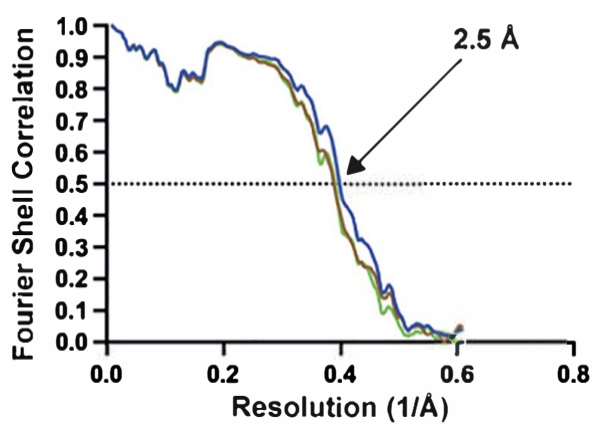

# 1 Supplementary Figure Legends

## 2 Supplementary Figure 1

3 Histopathology of Biondi bodies with Bodian silver

4 Choroid plexuses from case 2.

5 a, b, Numerous argyrophilic Biondi bodies in the cytoplasm of ependymal  
6 cells are seen in Bodian silver preparations. Enlargement of ependymal  
7 cells (b) shows multiple shapes of Biondi bodies including one in the form  
8 of a ring pointed to by an arrow in a. Scale bar, 25  $\mu\text{m}$  (a) and 5  $\mu\text{m}$  (b).

9

## 10 Supplementary Figure 2

11 Histopathology of Biondi bodies in the central canal of the spinal cord  
12 using Thioflavin S and antibody TMEM239

13 Spinal cord from case 4.

14 a, b, Ependymal cells lining the central canal of the spinal cord were  
15 stained with Thioflavin S. Numerous fluorescent Biondi bodies can be  
16 seen. High magnification of fluorescent inclusions in b that are denoted by  
17 an arrow in a. Scale bar, 25  $\mu\text{m}$  (a) and 2.5  $\mu\text{m}$  (b).

18 c, d, Ependymal cells lining the central canal of the spinal cord were  
19 stained with antibody TMEM239. Numerous immunoreactive Biondi bodies  
20 are seen. High magnification of TMEM239 immunopositive inclusions in d  
21 that are denoted by an arrow in c. Scale bar, 25  $\mu\text{m}$  (c) and 2.5  $\mu\text{m}$  (d).

22

23

24

25 Supplementary Figure 3

26 Double-labelling of choroid plexuses with Biondi bodies using anti-  
27 TMEM106B antibodies (A0303-439A and TMEM263) and amyloid dye  
28 pFTAA

29 Choroid plexuses from cases 9 and 10.

30 The panels on the left show single-labelling immunofluorescence of the  
31 choroid plexuses by antibody A303-439A (red) or antibody TMEM263  
32 (red); the panels in the middle show single-labelling fluorescence of  
33 Biondi bodies by pFTAA (green); the panels on the right show double-  
34 labelling of choroid plexuses by A303-439A and pFTAA or TMEM263 and  
35 pFTAA. Cell nuclei are labelled using Hoechst dye (blue). No co-labelling  
36 of A303-439A or TMEM263 and pFTAA was observed. Scale bar, 20  $\mu\text{m}$ .

37

38 Supplementary Figure 4

39 Choroid plexuses and ependymal cells lining the lateral ventricle that are  
40 devoid of Biondi bodies

41 Choroid plexuses and ependymal cells lining the lateral ventricle of case  
42 24.

43 a, The ependymal cells do not contain Biondi bodies; they show no  
44 specific fluorescence in Thioflavin S preparations (a,c) and are  
45 immunonegative for antibody TMEM239 (b,d). Scale bar, 25  $\mu\text{m}$ .

46

47

48



49 Supplementary Figure 5

50 Negative controls for immunofluorescence of choroid plexuses with Biondi  
51 bodies

52 Choroid plexuses from case 22. When anti-TMEM106B antibody TMEM239  
53 was omitted and only Alexa Fluor conjugated secondaries (488, 568, or  
54 647) were used, no specific signal was detected. pFTAA staining was  
55 performed to confirm the presence of Biondi bodies. Nuclei were labelled  
56 using Hoechst dye (blue). Scale bar, 10  $\mu\text{m}$ .

57

58 Supplementary Figure 6

59 Immunoelectron microscopy of a Biondi body

60 Choroid plexuses from case 8 and anti-TMEM106B antibody TMEM239.

61 The cytoplasm of an ependymal cell shows a round body made of  
62 osmiophilic material intimately related to a bundle of filaments decorated  
63 by gold particles and reminiscent of the shape of a phrygian cap (outlined  
64 by asterisks). The osmiophilic body has the appearance of a secondary  
65 lysosome or a residual body. The nucleus of the cell and mitochondria are  
66 seen around the inclusion. Scale bar, 1  $\mu\text{m}$ .

67

68 Supplementary Figure 7

69 Immunoelectron microscopy of a Biondi body

70 Choroid plexuses from case 11 and anti-TMEM106B antibody TMEM239.

71 a, The cytoplasm of an ependymal cell contains bundles of filaments that  
72 are decorated by gold particles. Two large bundles (outlined by asterisks)

73 are seen in association with a large, round dense osmiophilic structure.  
74 Within this structure, an electron-lucent area can also be seen. A smaller  
75 bundle of filaments decorated by gold particles is present in the lower  
76 part of the picture (arrowhead). Scale bar, 800 nm.

77 b, Higher magnification of the filament bundle (denoted by the box in a)  
78 decorated by gold particles. Scale bar, 160 nm.

79

## 80 Supplementary Figure 8

81 Immunoelectron microscopy of a Biondi body

82 Choroid plexuses from case 11.

83 a, Biondi body consisting of a ring of filaments (outlined by asterisks)  
84 decorated by gold particles surrounding a large round osmiophilic and  
85 electron-lucent inclusion. Mitochondria are seen in the vicinity. Scale bar,  
86 1  $\mu\text{m}$ .

87 b, A bundle of filaments, decorated by gold particles, is intermixed with  
88 round osmiophilic bodies and is adjacent to mitochondria. Scale bar, 1  
89  $\mu\text{m}$ .

90

## 91 Supplementary Figure 9

92 Fourier shell correlation curves and resolution estimates

93 Solvent-corrected Fourier shell correlation (FSC) curves of cryo-EM half  
94 maps (left panels) and model-to-map validation (right panels) for the

95 TMEM106B fold I Biondi variant from case 20 (Table 2). FSC curve

96 between a model refined in half-map 1 and half-map 2 is shown in brown

- 97 (model 1 versus half-map 1) and FSC curve between the same model and
- 98 half map 2 is shown in green (model 1 versus half-map 2).
